# Supplementary material for: Metal–organophosphine and metal–organophosphonium frameworks with layered honeycomb-like structures
Source: Royal Society of Chemistry journal article supplement (doi:10.1039/b820038f), 2009-01-01
Supplement: b820038f.pdf [file b820038f.pdf]

## SUPPLEMENTARY INFORMATION

# Metal-Organophosphine and Metal- Organophosphonium Frameworks with Layered Honeycomb-like Structures

*Simon M. Humphrey*<sup>\*†‡</sup> *Phoebe K. Allan*<sup>†</sup> *Shaunt E. Oungouliau*<sup>†</sup> *Matthew S. Ironside*<sup>†</sup> and  
*Erica R. Wise*<sup>†</sup>

University Chemical Laboratory, University of Cambridge, Lensfield Road, Cambridge CB2  
1EW, U.K. and St John's College, Cambridge CB2 1TP, U.K.

Email: smh49@cam.ac.uk.

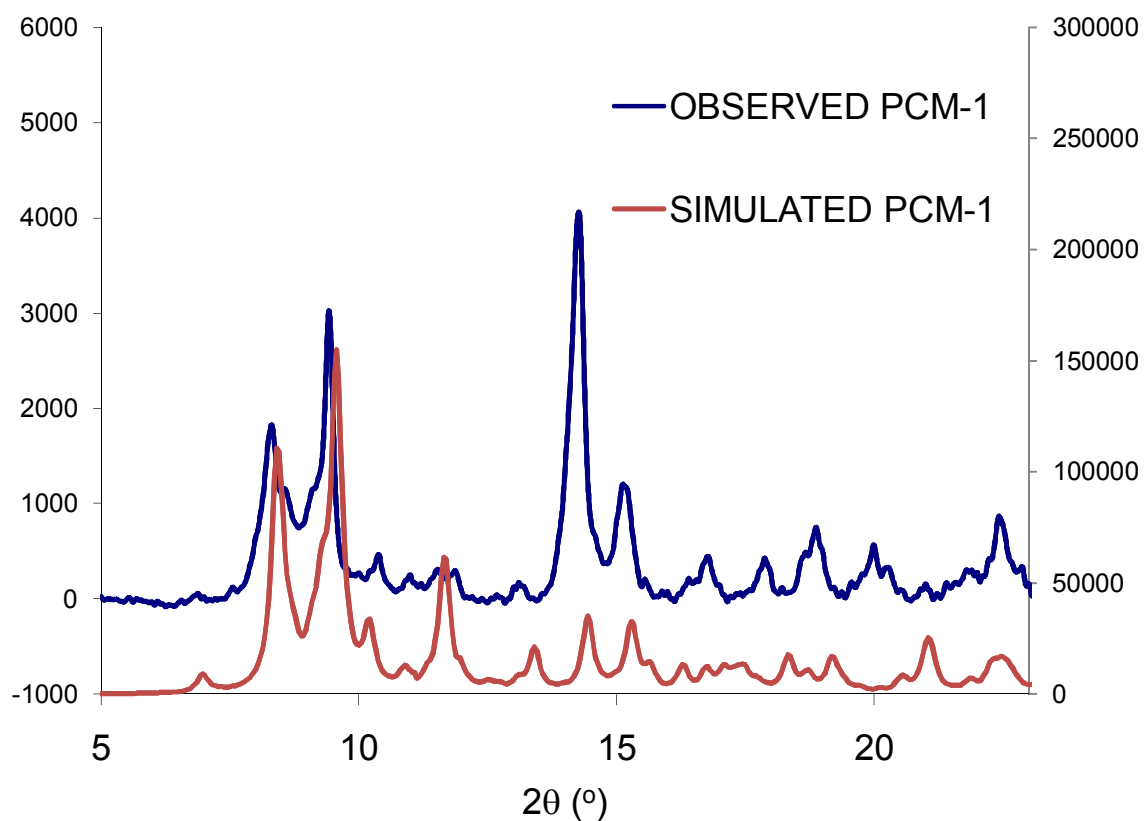

**Figure S1.** XRPD for PCM-1; for the dehydrated powder diffraction pattern of PCM-1 (above) the  $a$ -axis length was found to double ( $a = 88.38 \text{ \AA}$ ) as a result of lowering of cell symmetry from orthorhombic to monoclinic. This can be rationalized based on the structure of PCM-1, wherein the pair of unique residues in the asymmetric unit become equivalent upon loss of DMF solvent.

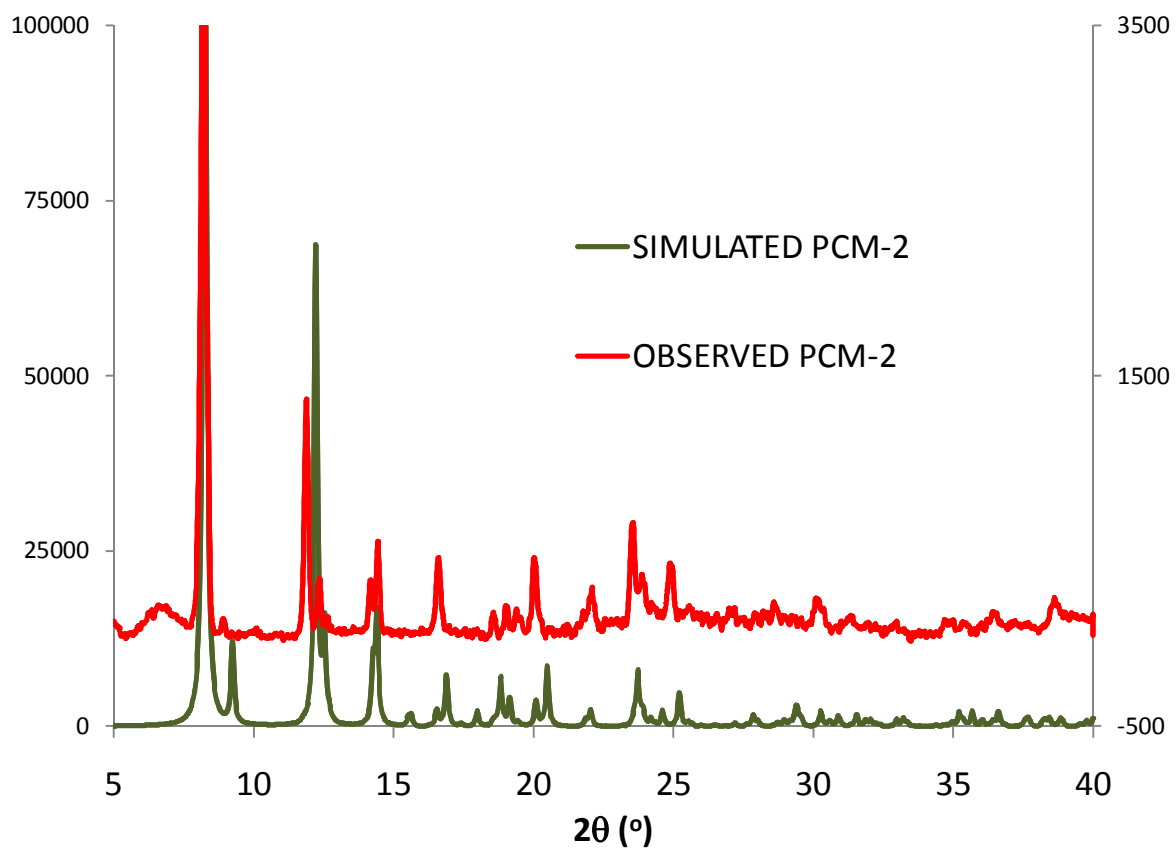

**Figure S2.** XRPD for PCM-2

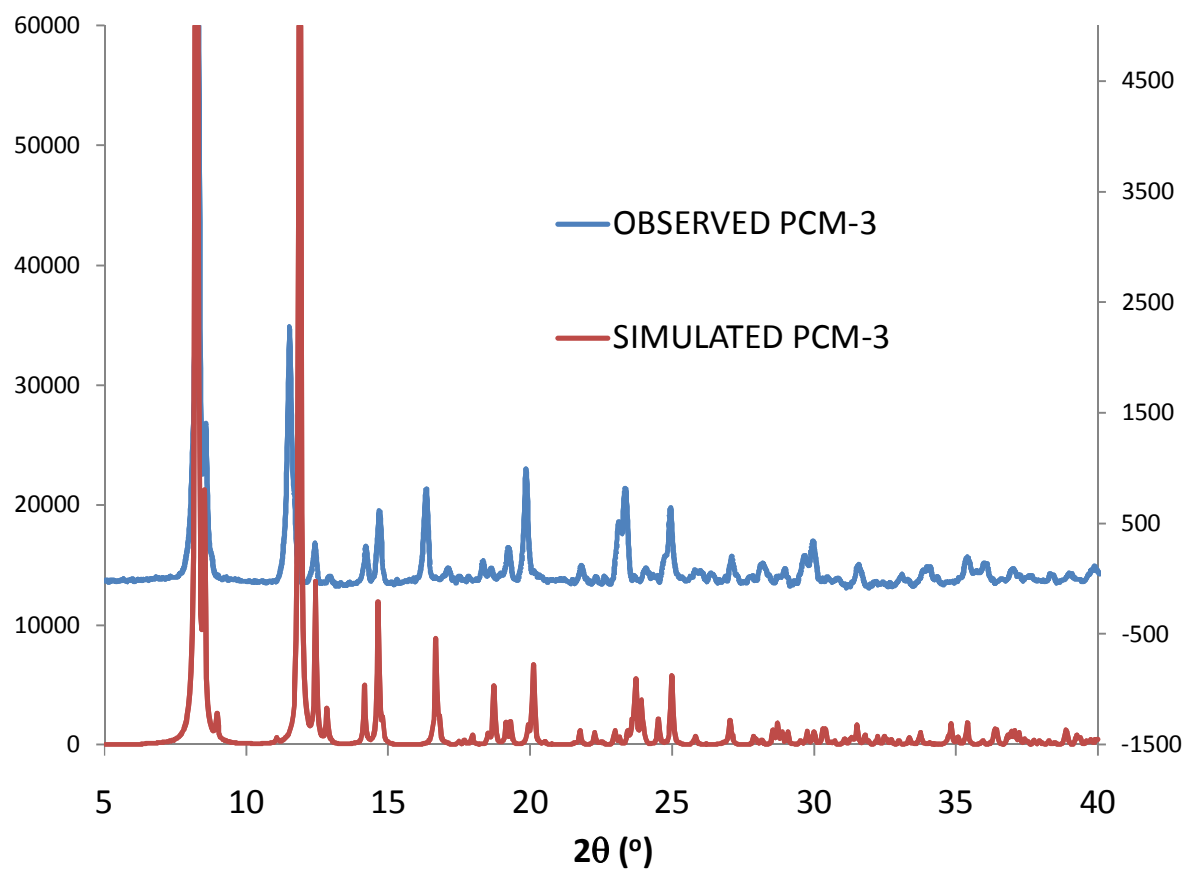

**Figure S3.** XRPD for PCM-3

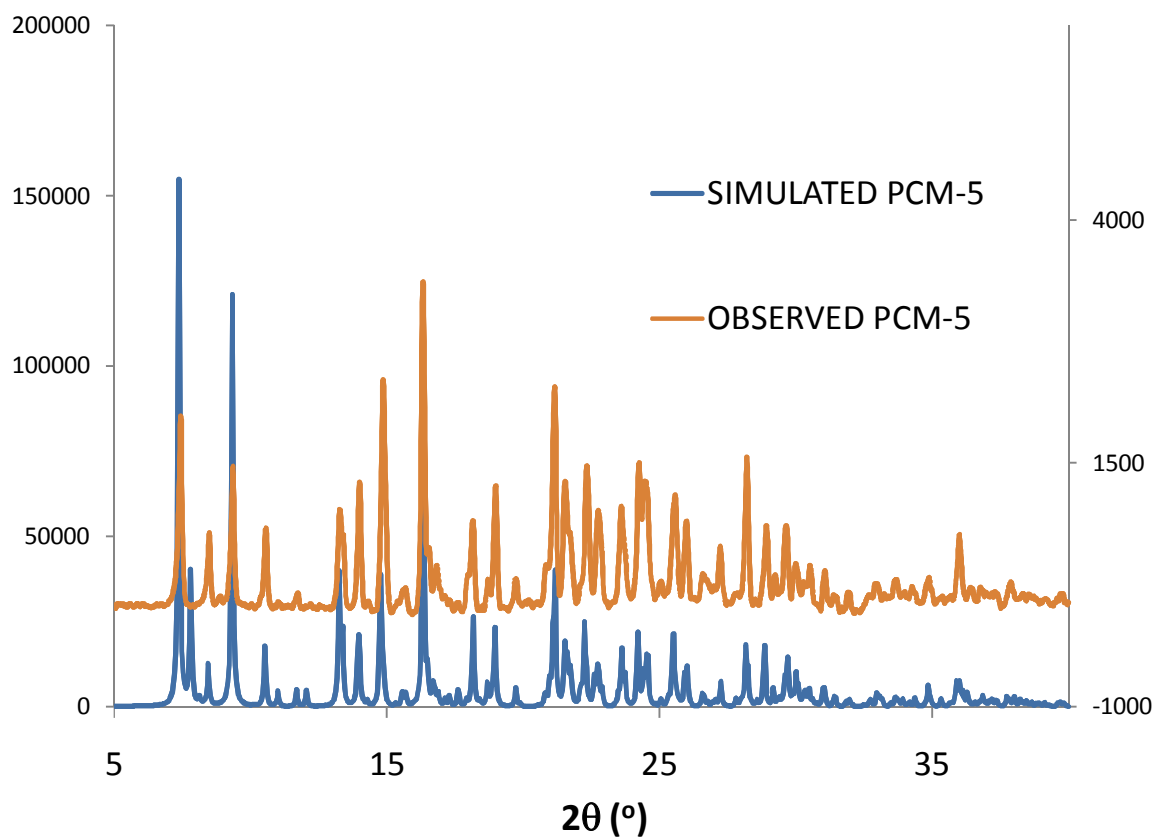

**Figure S4.** XRPD for PCM-5
